# Supplementary material for: Inner space- and architecture-controlled nanoframes for efficient electro-oxidation of liquid fuels
Source: Royal Society of Chemistry journal article supplement (doi:10.1039/c9ta05639d), 2019-01-01
Supplement: c9ta05639d1.pdf [file c9ta05639d1.pdf]

## Supporting Information

### Inner space- and architecture-controlled nanoframes for efficient electro-oxidation of liquid fuels

*Daowei Gao<sup>a,b,#</sup>, Shuna Li<sup>a,#</sup>, Guolong Song<sup>a</sup>, Mingchuan Luo<sup>\* c</sup>, Yipin Lv<sup>a</sup>, Shaohan Yang<sup>a</sup>, Xinlong Ma<sup>\* d</sup>, Xin Zhang<sup>d</sup>, Cuncheng Li<sup>a</sup>, Qin Wei<sup>a</sup>, and Guozhu Chen<sup>\* a</sup>*

<sup>a</sup>School of Chemistry and Chemical Engineering, University of Jinan, Jinan 250022, PR China

<sup>b</sup>Helmholtz-Zentrum Berlin für Materialien und Energie GmbH, Berlin 12489, Germany

<sup>c</sup>Department of Materials Science and Engineering, College of Engineering, Peking University, Beijing, 100871, China

<sup>d</sup>State Key Laboratory of Heavy Oil Processing, China University of Petroleum, Beijing 102249, PR China

<sup>#</sup>Daowei Gao and Shuna Li contributed equally to this work.

\*To whom correspondence should be addressed:

E-mail: chm\_chengz@ujn.edu.cn; mingchuanluo@foxmail.com; maxl@cup.edu.cn

**Table S1.** Surface composition and oxidation state of PtCuNi NPs from XPS analysis.

| Sample       | Pt(II)/Pt(0) | Cu(II)/(Cu(I)+ Cu(0)) | Ni(II)/Ni(0) |
|--------------|--------------|-----------------------|--------------|
| PtCuNi o-NFs | 0.52         | 0.45                  | 2.17         |
| PtCuNi c-NFs | 0.86         | 0.72                  | 2.78         |
| PtCuNi h-NFs | 0.89         | 0.46                  | 0.88         |
| PtCuNi HWs   | 0.53         | 0.74                  | 3.97         |

**Table S2.** Peak and onset potential of CO stripping on various catalysts.

| sample        | onset potential of CO oxidation vs SCE (V) | peak potential of CO oxidation vs SCE (V) |
|---------------|--------------------------------------------|-------------------------------------------|
| PtCuNi c-NFs  | 0.39                                       | 0.52                                      |
| PtCuNi o-NFs  | 0.43                                       | 0.60                                      |
| PtCuNi h-NFs  | 0.59                                       | 0.65                                      |
| PtCuNi HWs    | 0.61                                       | 0.69                                      |
| PtCuNi th-NFs | 0.59                                       | 0.64                                      |
| Pt /C         | 0.62                                       | 0.70                                      |

**Table S3.** Calculated adsorption energies ( $\Delta E$ ) of OH, H and CH<sub>3</sub>OH and d-band centers of Pt, Cu, and Ni on different metallic surfaces.

| Surfaces                                                | $\Delta E$ (eV) |       |                    | $\varepsilon_d$ (eV) |       |       |
|---------------------------------------------------------|-----------------|-------|--------------------|----------------------|-------|-------|
|                                                         | OH              | H     | CH <sub>3</sub> OH | Pt                   | Cu    | Ni    |
| Pt(111)                                                 | -2.54           | -0.39 | -0.65              | -2.51                | --    | --    |
| Pt <sub>1</sub> Cu <sub>5/3</sub> (111)                 | -3.57           | -0.17 | -0.61              | -2.24                | -2.05 | --    |
| Ni <sub>x</sub> Pt <sub>1</sub> Cu <sub>5/3</sub> (111) | -3.68           | -0.37 | -0.55              | -2.29                | -2.05 | -1.41 |
| Ni <sub>x</sub> Pt <sub>1</sub> Cu <sub>1</sub> (111)   | -3.33           | -0.40 | -0.52              | -2.21                | -1.91 | -1.17 |
| Ni <sub>x</sub> Pt <sub>1</sub> Cu <sub>3</sub> (111)   | -3.67           | -0.44 | -0.52              | -2.30                | -2.07 | -1.20 |
| Ni <sub>x</sub> Pt <sub>1</sub> Cu <sub>5/3</sub> (211) | -3.88           | -0.29 | -0.38              | -2.14                | -1.87 | -0.72 |

**Table S4.** Performance comparison of MOR and FAOR over Pt-based catalysts with recent literatures

| Catalysts            | Specific activity<br>(mA/cm <sup>2</sup> ) |       | Mass activity<br>(mA/ $\mu$ g <sub>Pt</sub> ) |       | Reference |
|----------------------|--------------------------------------------|-------|-----------------------------------------------|-------|-----------|
|                      | CH <sub>3</sub> OH                         | CHOOH | CH <sub>3</sub> OH                            | CHOOH |           |
| PtCuNi c-NFs         | 5.04                                       | 2.39  | 1.08                                          | 0.52  | This work |
| PtCuNi o-NFs         | 4.68                                       | 2.04  | 0.51                                          | 0.23  | This work |
| Pt–Mn–Cu CNC         | 4.13                                       | 1.87  | 0.42                                          | 0.19  | [1]       |
| Pt–Cu CNC            | 4.70                                       | –     | –                                             | –     | [2]       |
| Pt–Ni HOH            | 1.70                                       | 0.13  | 0.45                                          | 0.07  | [3]       |
| Pt–Pd CNC            | 8.50                                       | –     | 0.32                                          | –     | [4]       |
| Pt–Cu–Ni CNC         | 1.97                                       | 1.50  | 0.11                                          | 0.07  | [5]       |
| Pt Concave           | –                                          | 3.70  | –                                             | 0.18  | [6]       |
| Pt <sub>3</sub> V/C  | 0.38                                       | –     | 0.20                                          | –     | [7]       |
| Pt <sub>3</sub> Ti/C | 0.31                                       | –     | 0.15                                          | –     | [7]       |
| PtAgCu@PtCu          | –                                          | 1.63  | –                                             | 0.31  | [8]       |
| Pt–Co NWs            | 1.95                                       | –     | 1.02                                          | –     | [9]       |
| Pt–Pd Hollow         | 1.36                                       | –     | 0.58                                          | –     | [10]      |

**Table S5.** Comparison of the activity of commercial Pt in the literatures.

| Catalysts | Specific activity (mA/cm <sup>2</sup> ) |       | References |
|-----------|-----------------------------------------|-------|------------|
|           | CH <sub>3</sub> OH                      | CHOOH |            |
| Pt/C      | 0.46                                    | 0.16  | This work  |
|           |                                         | 0.22  | [11]       |
|           | 0.47                                    | 0.23  | [12]       |
|           | 0.83                                    | 0.62  | [13]       |
|           | 1.19                                    | -     | [14]       |
|           | 0.56                                    | -     | [15]       |
|           | 0.59                                    | -     | [16]       |
|           | 0.46                                    | -     | [17]       |
|           | 0.4                                     |       | [18]       |
|           | 0.47                                    | 0.23  | [19]       |
|           | 1.04                                    |       | [20]       |
|           | 0.35                                    | 0.82  | [21]       |
|           | 0.3                                     |       | [22]       |
|           | 1.25                                    |       | [23]       |

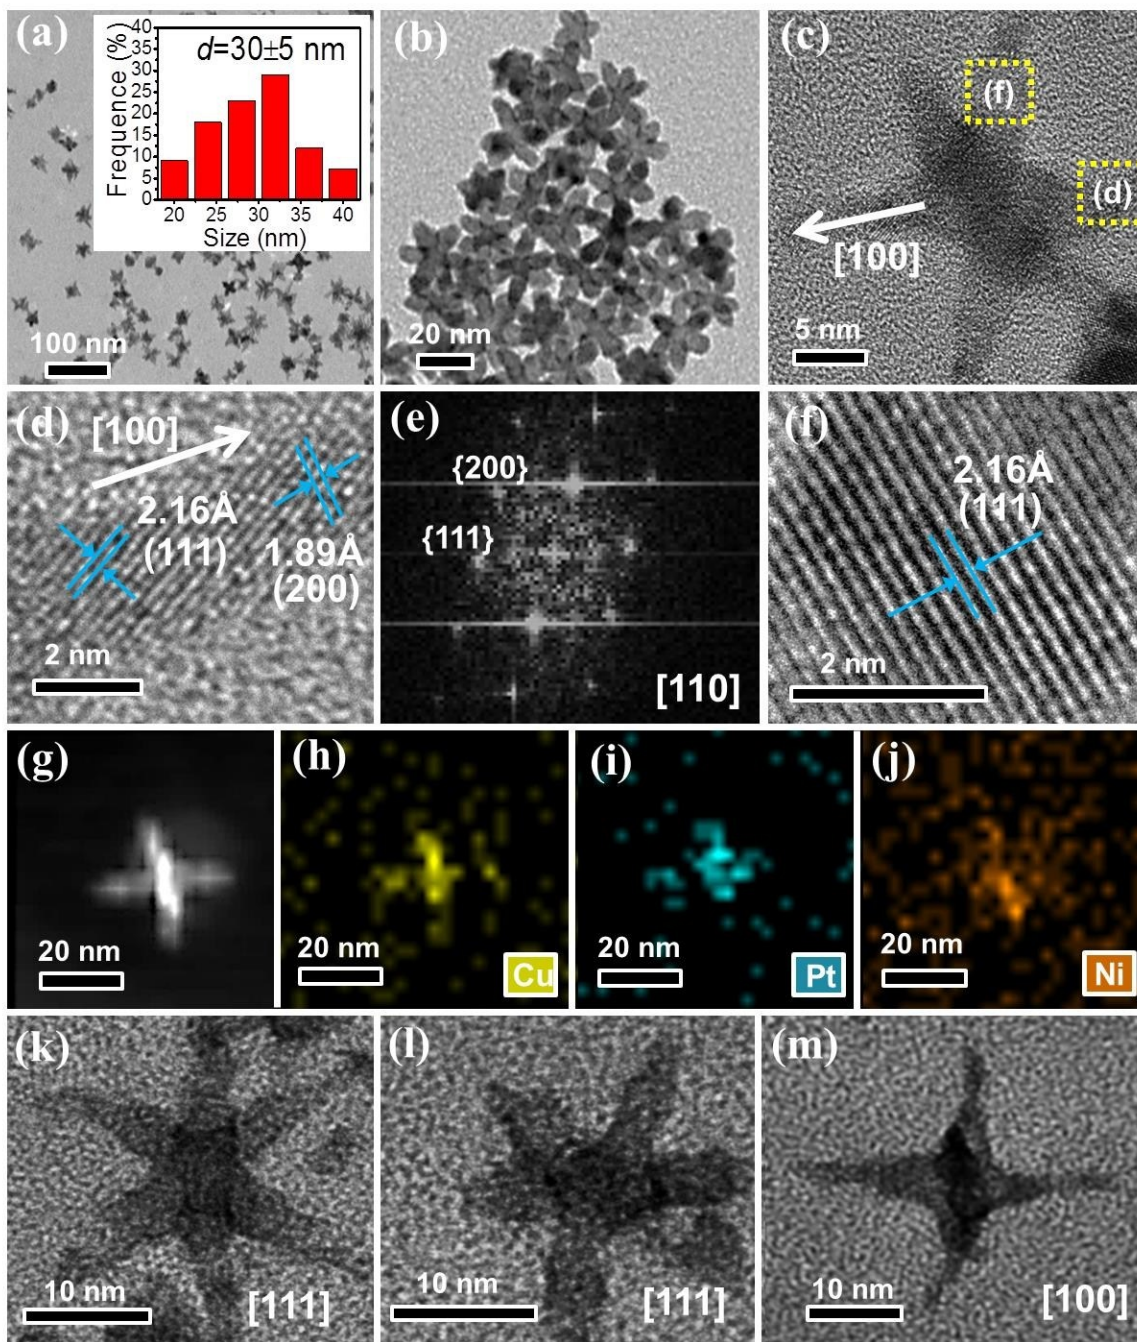

**Figure S1.** (a–b) TEM, size-distribution histogram (inset), (c–f) HRTEM and FFT images of PtCuNi h-NFs. (g) HAADF-STEM and (h–j) EDS mapping images of PtCuNi h-NFs. (k–m) TEM images and structural models of PtCuNi h-NFs viewed along the (k) [111], (l) [111], and (m) [100] directions.

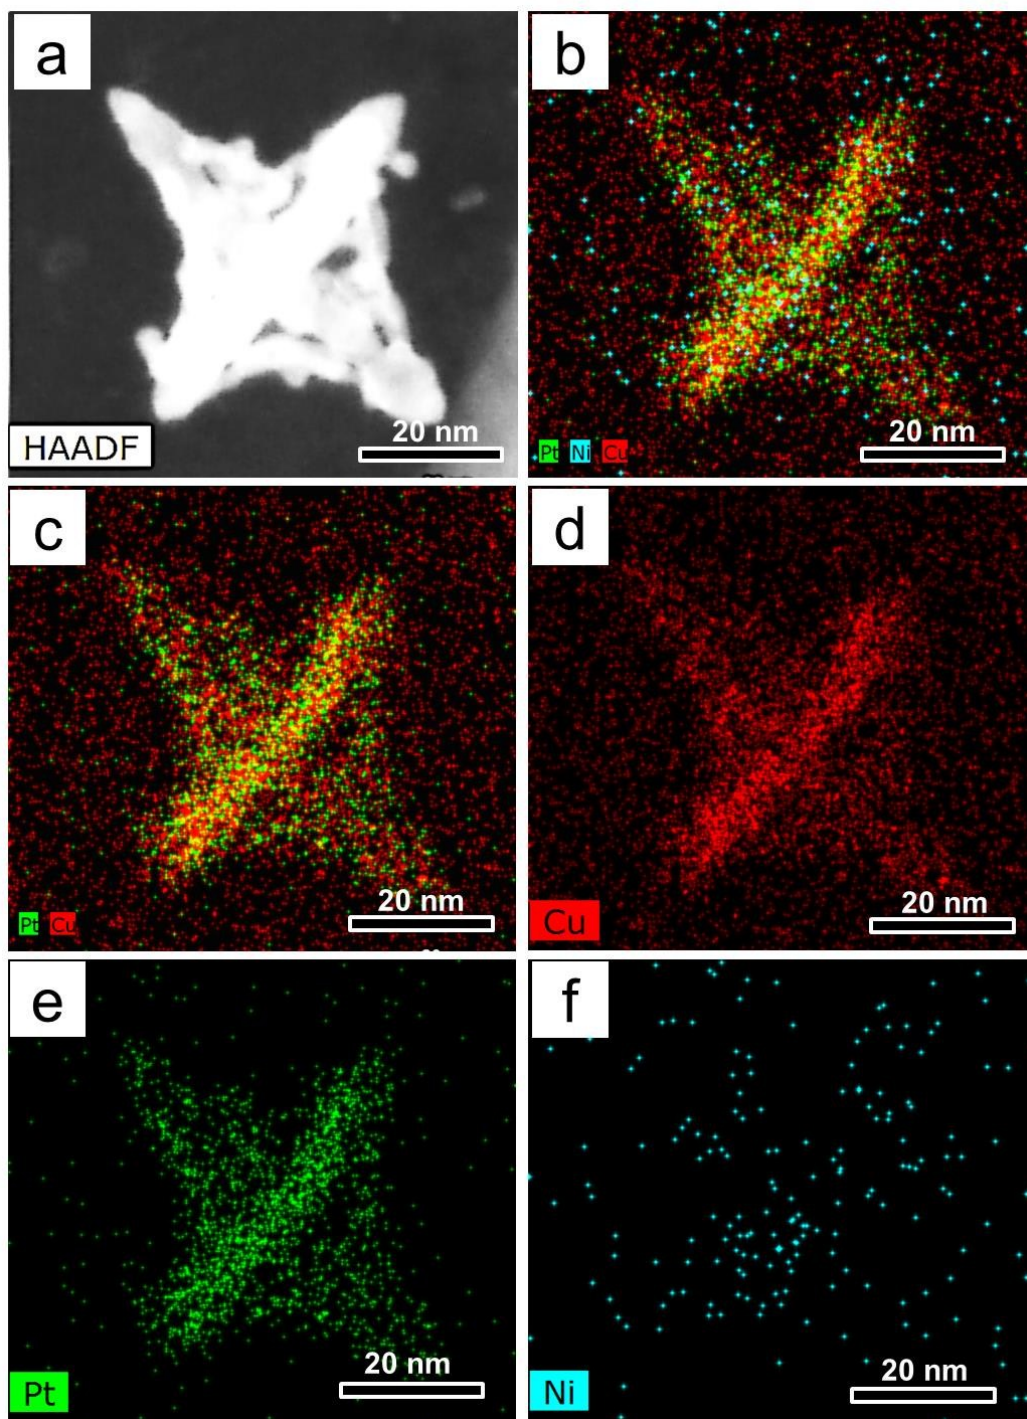

**Figure S2.** (a) HAADF-STEM and (b-f) EDS-mapping images of PtCuNi o-NFs.



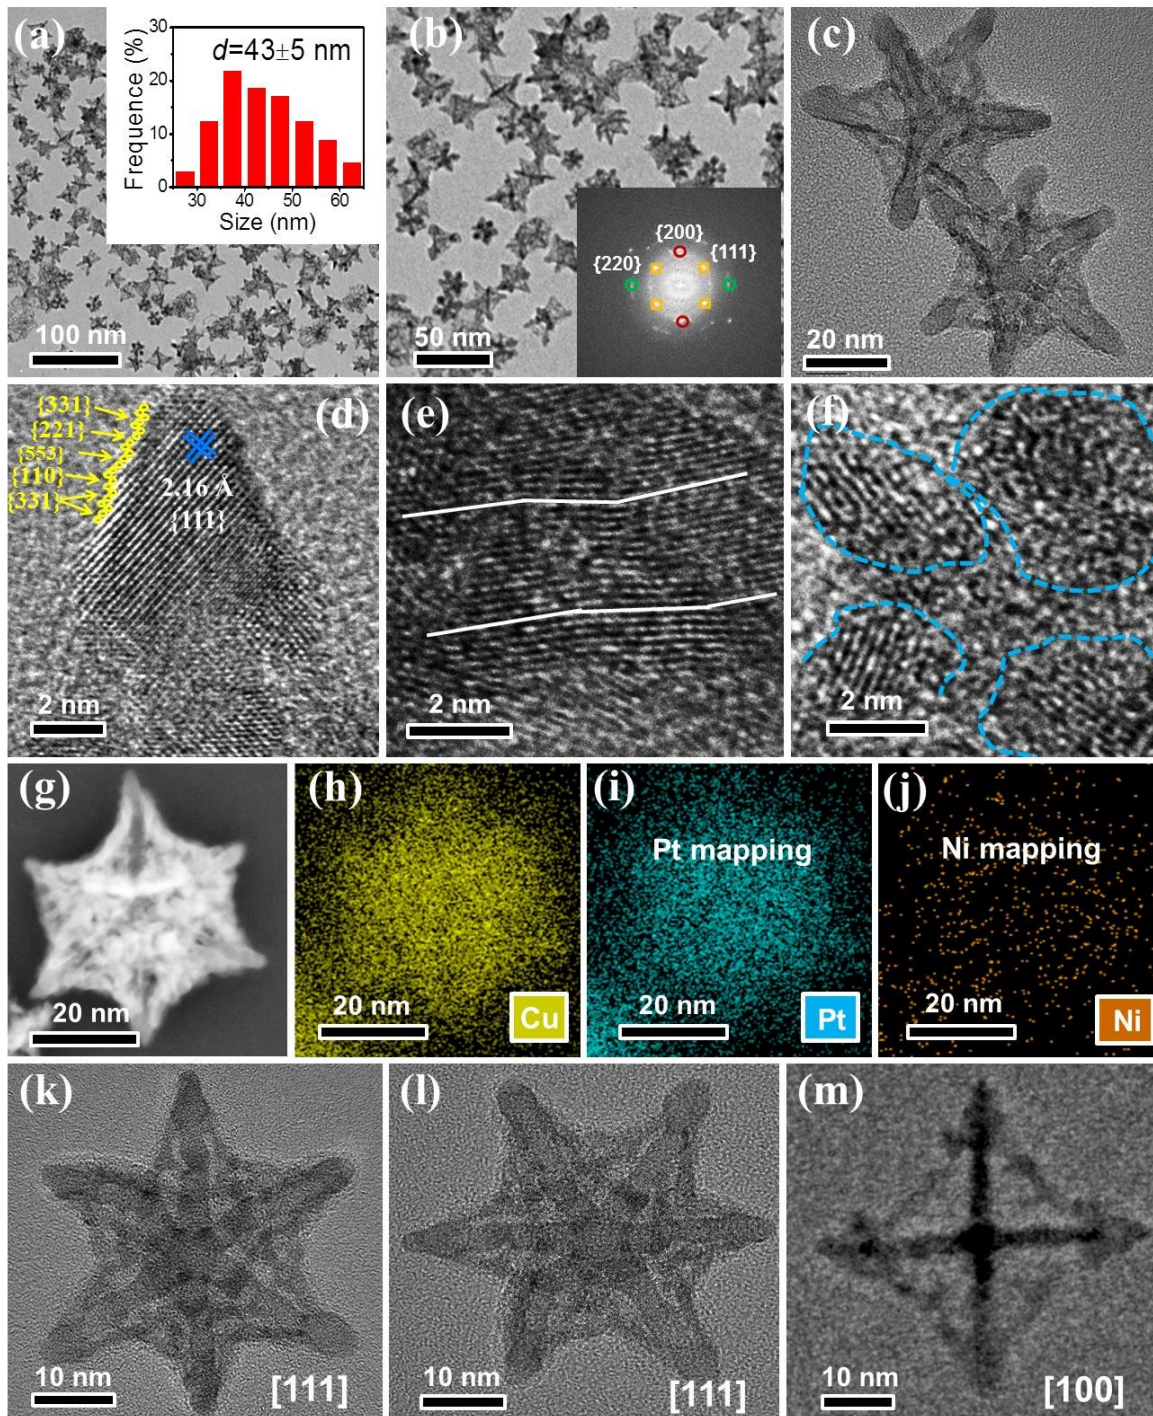

**Figure S3.** (a–c) TEM, size-distribution histogram (inset), FFT (inset), (d) step atoms, and (e, f) interfacial dislocation images of PtCuNi c-NFs. (g) HAADF-STEM and (h–j) EDS mapping images of PtCuNi c-NFs. (k–m) TEM images and structural models of PtCuNi c-NFs viewed along the (k) [111], (l) [111], and (m) [100] directions.



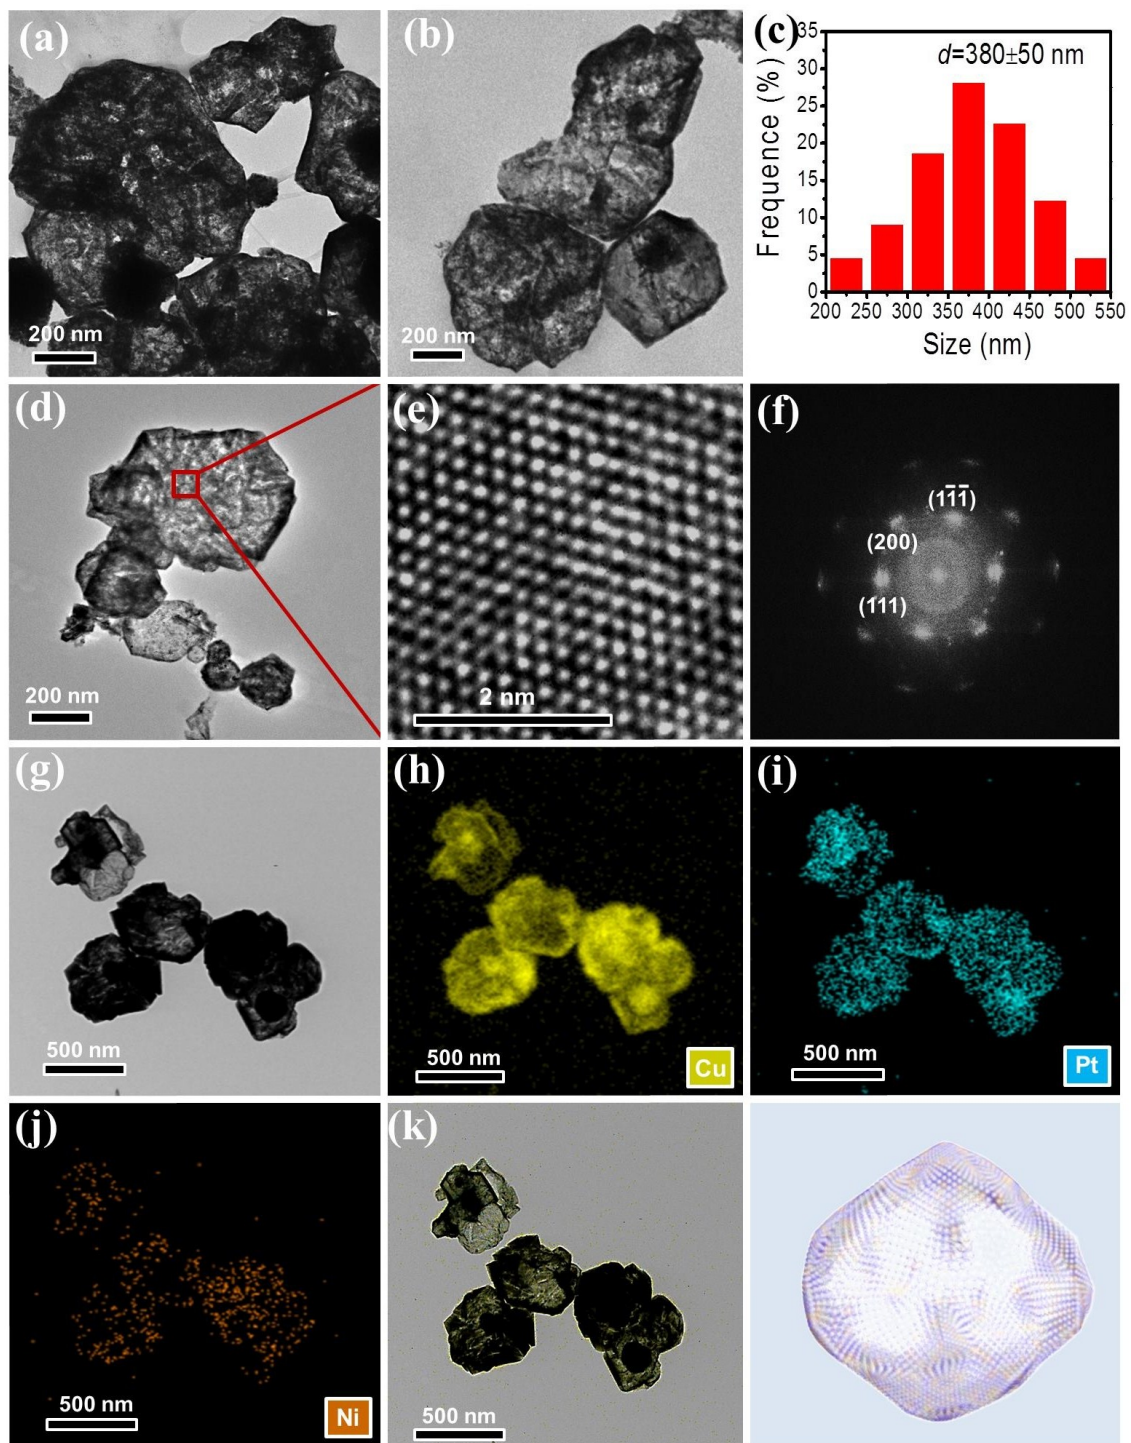

**Figure S4.** (a-d) TEM images, size-distribution histogram of PtCuNi HWs. (e) The HRTEM, (f) corresponding FFT, and (g-k) EDS-mapping images of PtCuNi HWs.

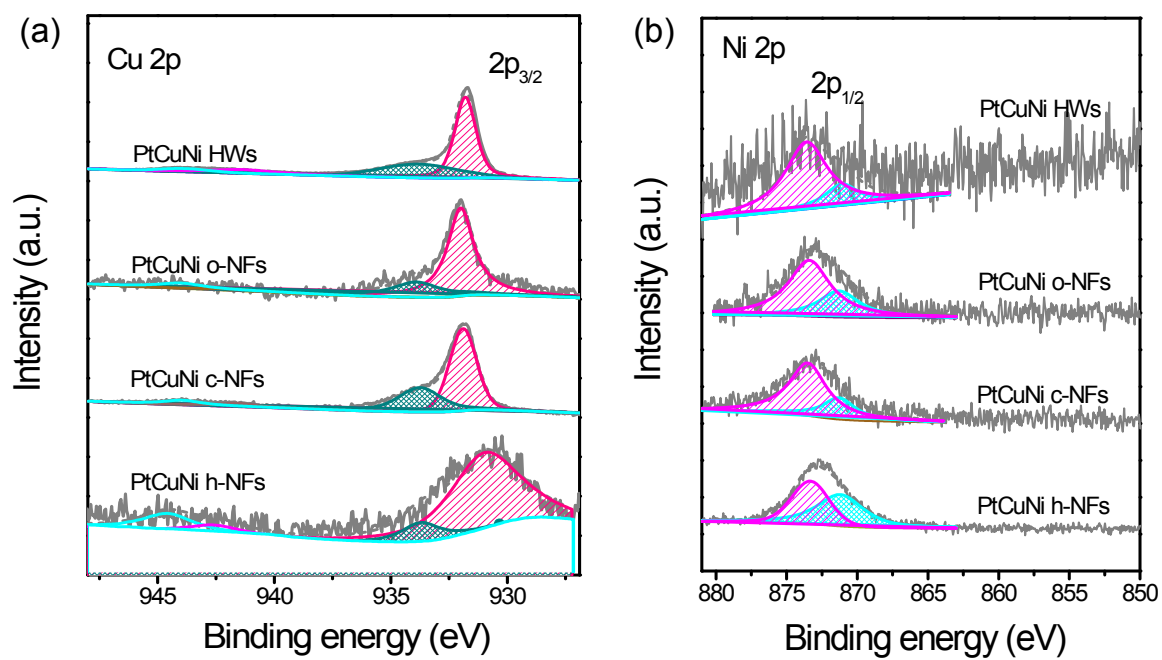

**Figure S5.** XPS spectra of (a) Cu 2p and (b) Ni 2p for PtCuNi with different structures.

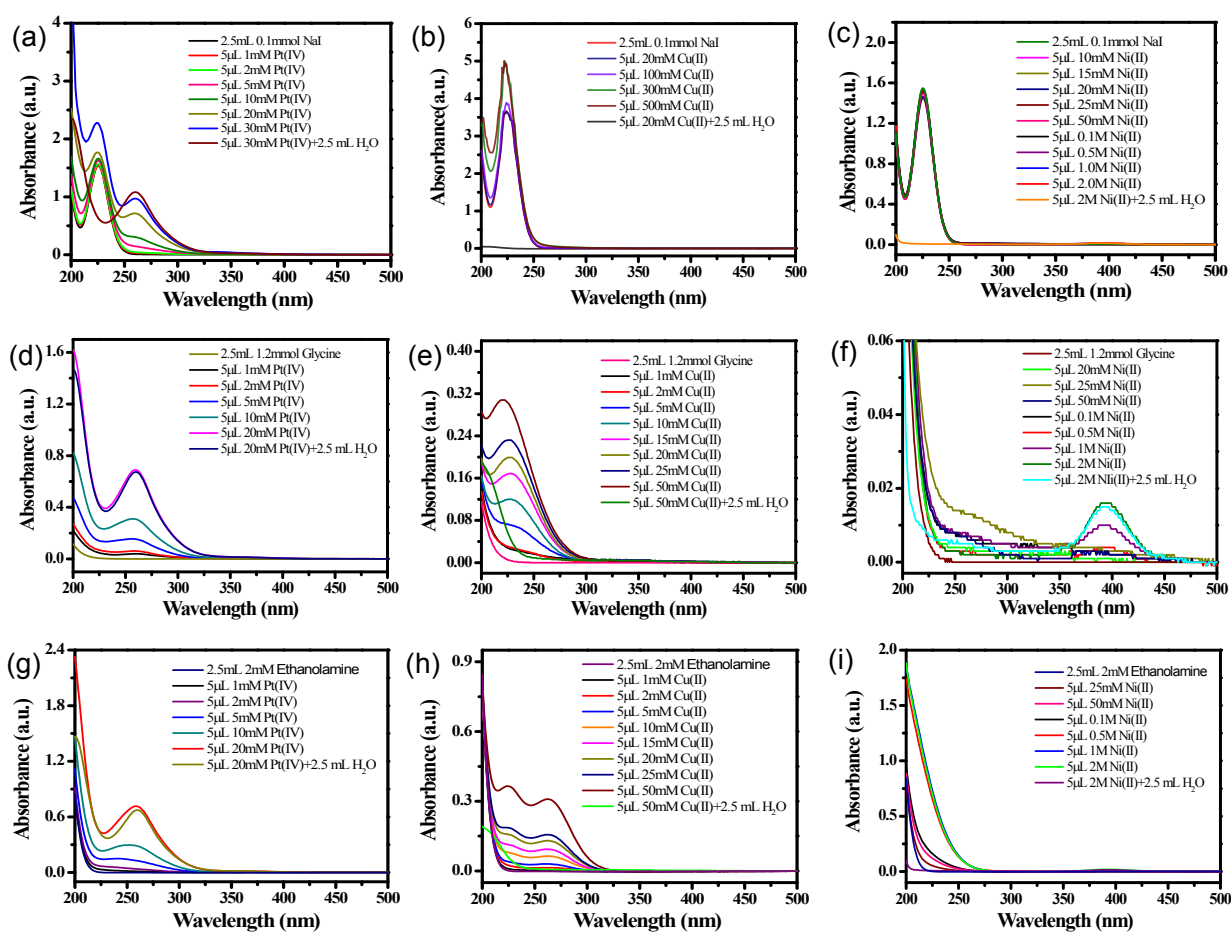

**Figure S6.** Study of the interaction between (a-c)  $\Gamma^-$ , (d-f) glycine and (g-i) ethanolamine and  $\text{Pt(IV)}$ ,  $\text{Cu(II)}$  and  $\text{Ni(II)}$  ions by UV-vis spectroscopy at room temperature.

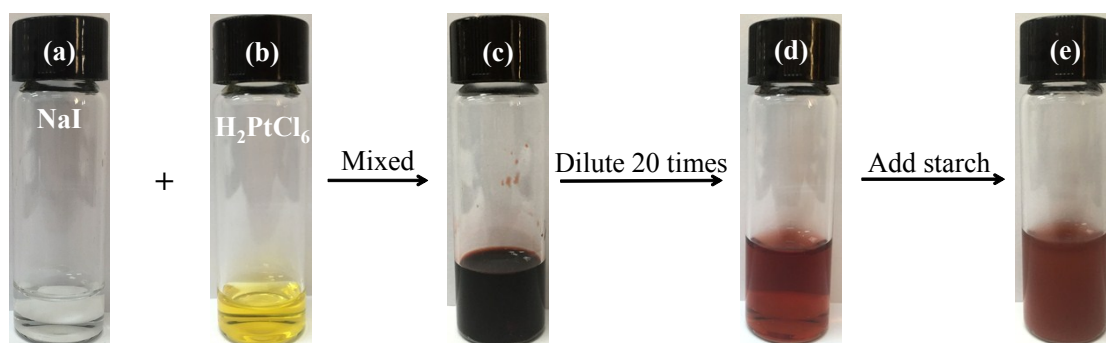

**Figure S7.** The study of the reaction between  $\text{H}_2\text{PtCl}_6$  and  $\text{NaI}$ .

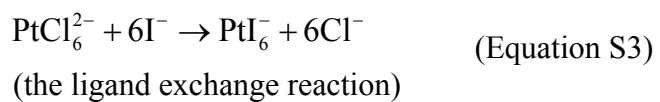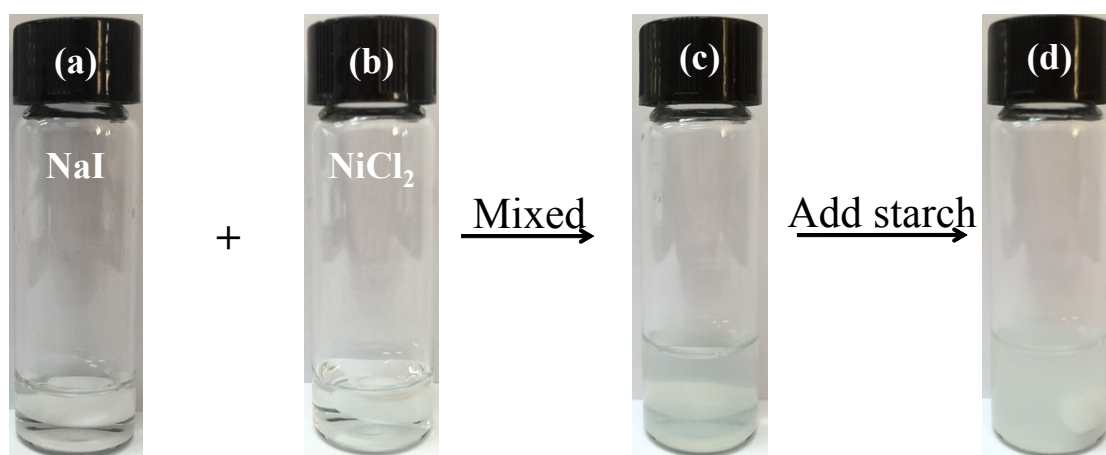

**Figure S8.** The study of the reaction between  $\text{NiCl}_2$  and  $\text{NaI}$ .

The  $\text{Ni(II)}$  ions has no react with  $\text{I}^-$ .

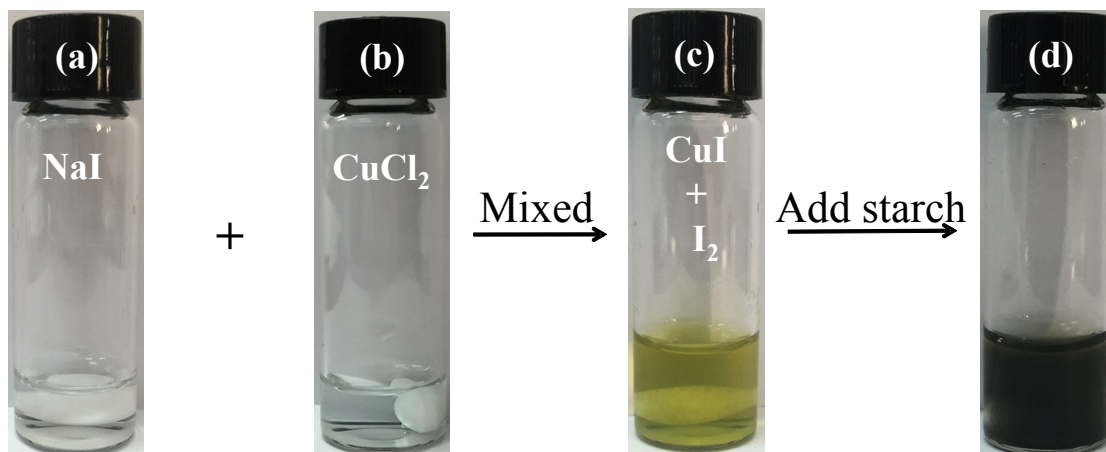

**Figure S9.** The study of the reaction between  $\text{Cu(II)}$  and  $\text{NaI}$ .

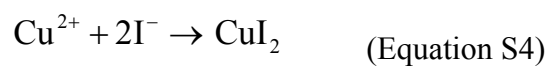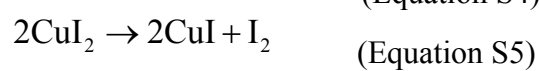

It can be found from the starch reaction that the reaction of  $\text{Cu}^{2+}$  and  $\text{I}^{-}$  produces  $\text{I}_2$ .

According to reference, the reaction of  $\text{Cu}^{2+}$  and  $\text{I}^{-}$  first generates  $\text{CuI}_2$ . The  $\text{CuI}$  nanocrystals have poor stability, and further formation of  $\text{CuI}$  and  $\text{I}_2$ .

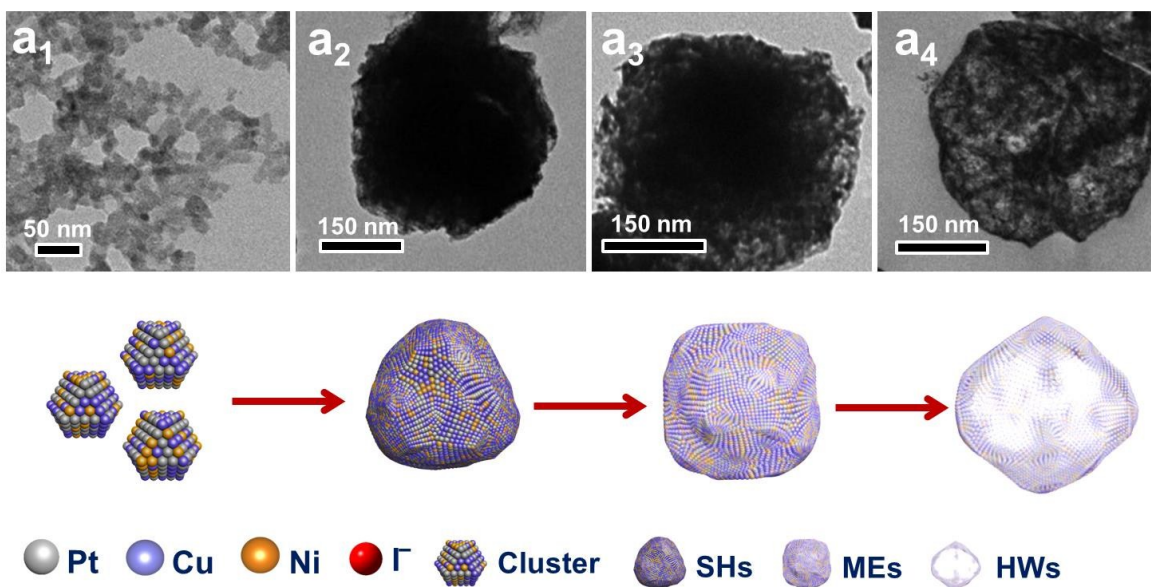

**Figure S10.** TEM images investigating the course of morphological evolution for PtCuNi with the absence of NaI. (a<sub>1</sub>)–(a<sub>4</sub>) represent the reaction time at 1, 5, 20, and 30 min, respectively.

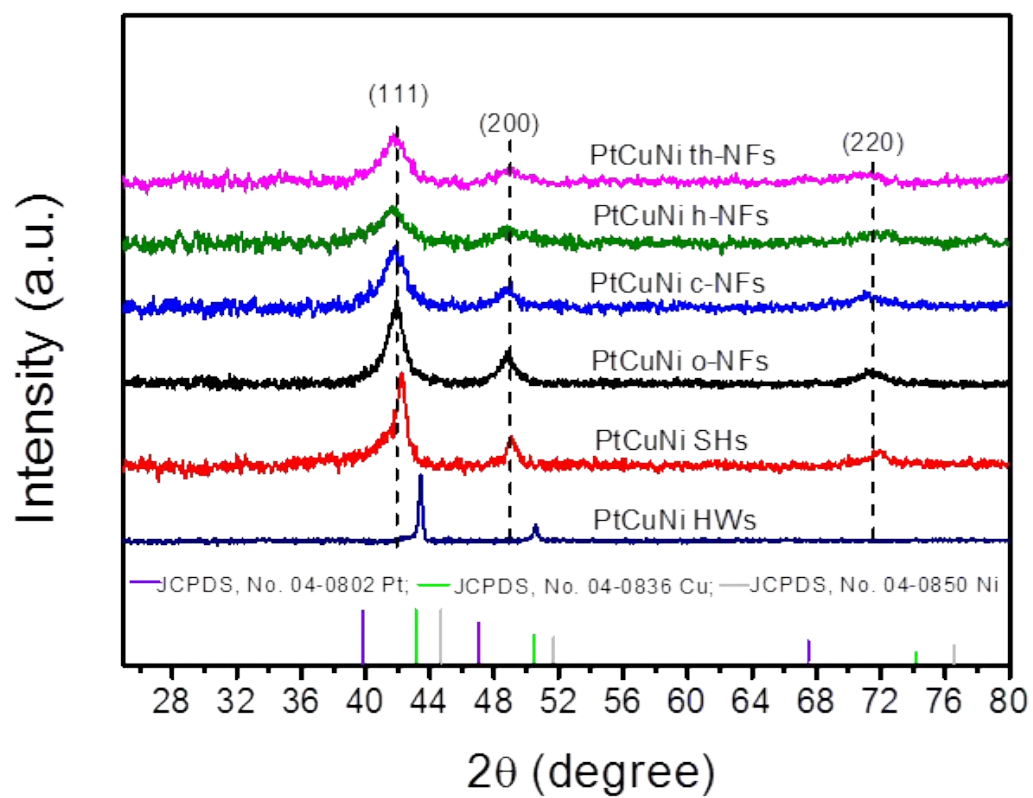

**Figure S11.** XRD patterns of PtCuNi with different structures.



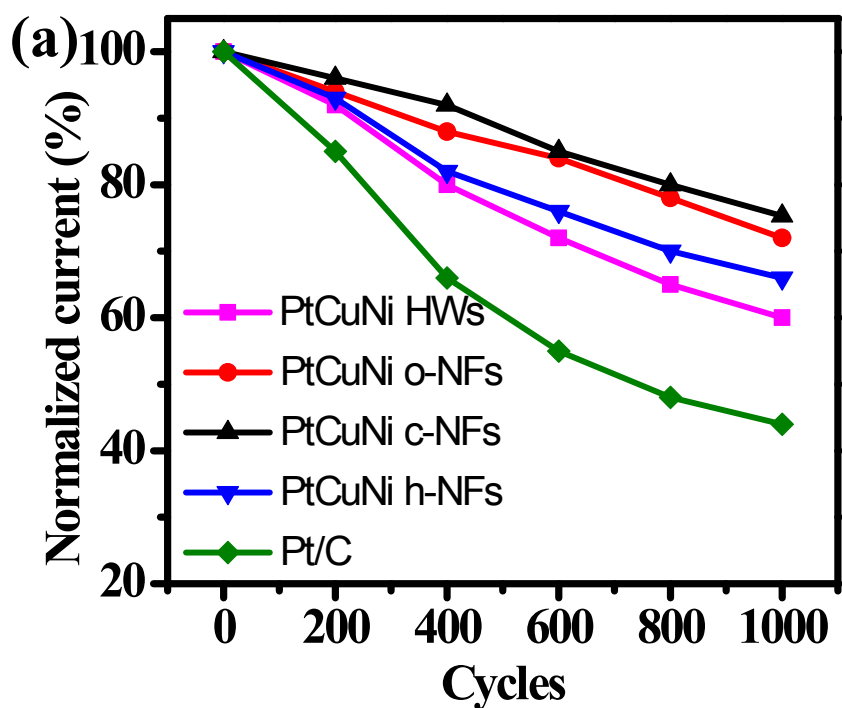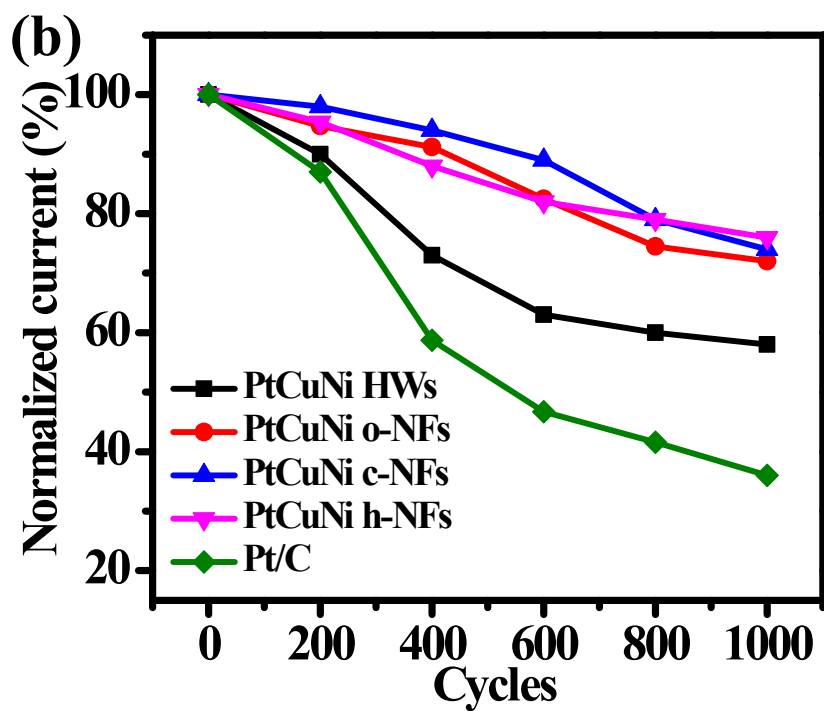

**Figure S12.** The loss of peak current densities of MOR and FAOR as a function of the number of cycles on different electrocatalysts. The potential was scanned from  $-0.24$  to  $1.0$  V (vs SCE) with a sweep rate of  $50 \text{ mV s}^{-1}$ .

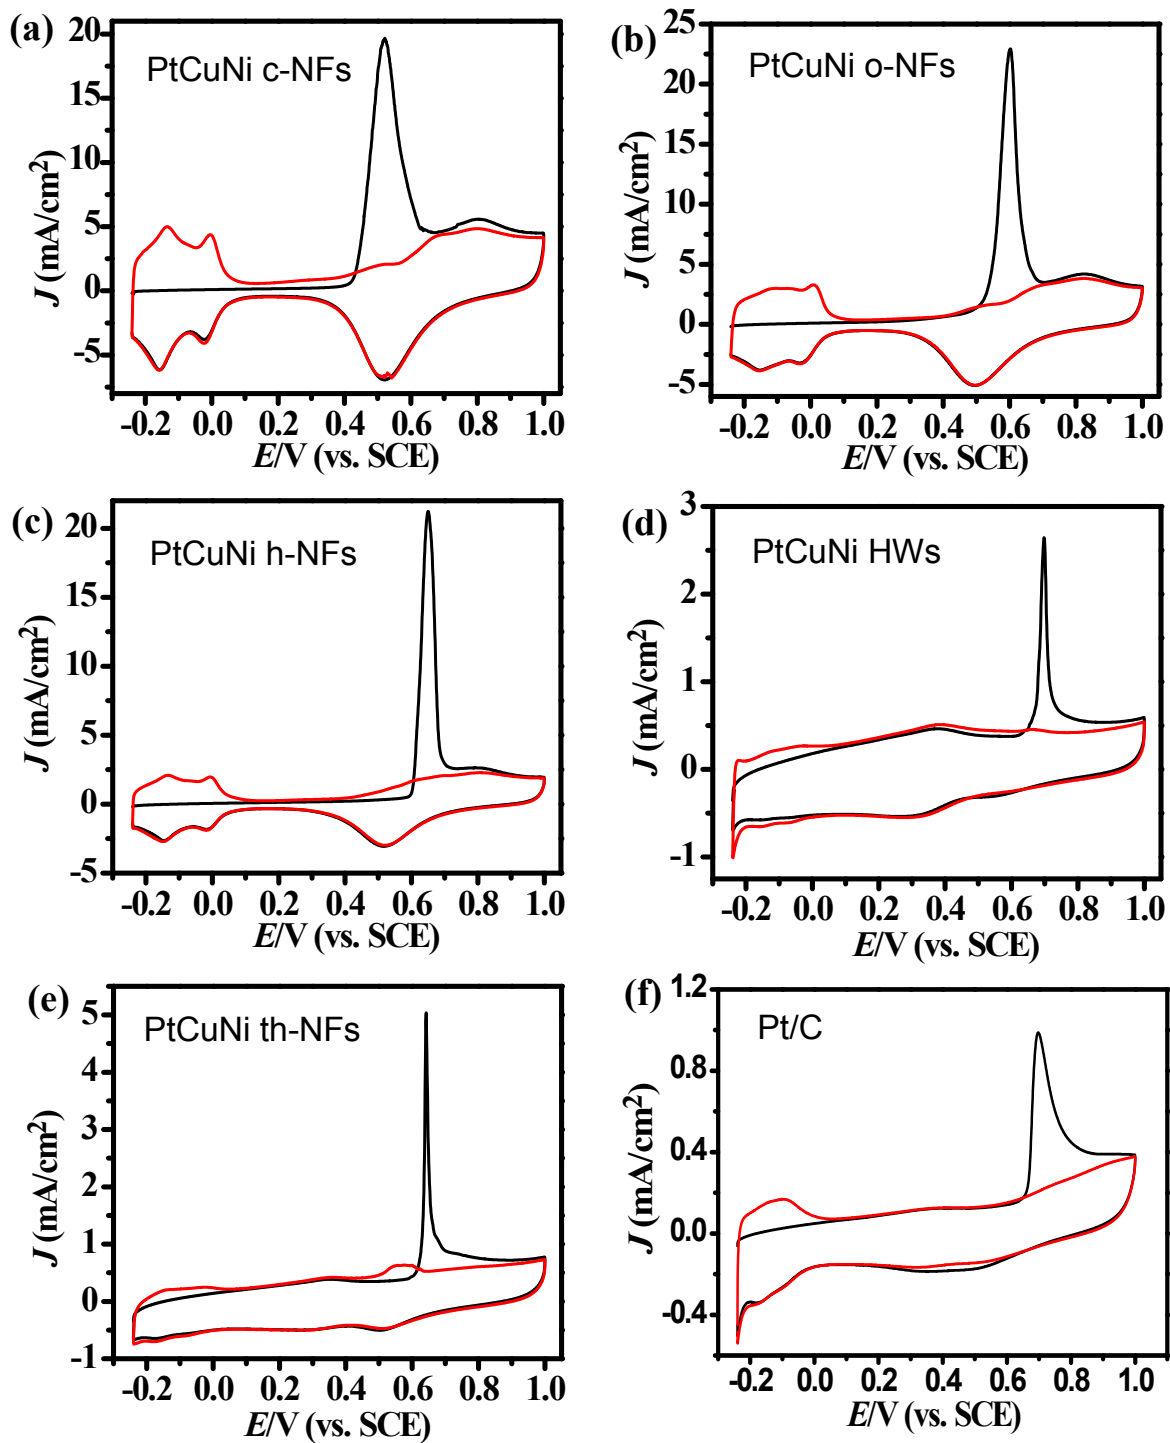

**Figure S13.** CO-stripping voltammograms (black line standing for first cycle, red line standing for second cycle) of these catalysts in 0.5 M  $\text{H}_2\text{SO}_4$  at a scan rate of 50 mV/s.

Cu(111): -3.28eV

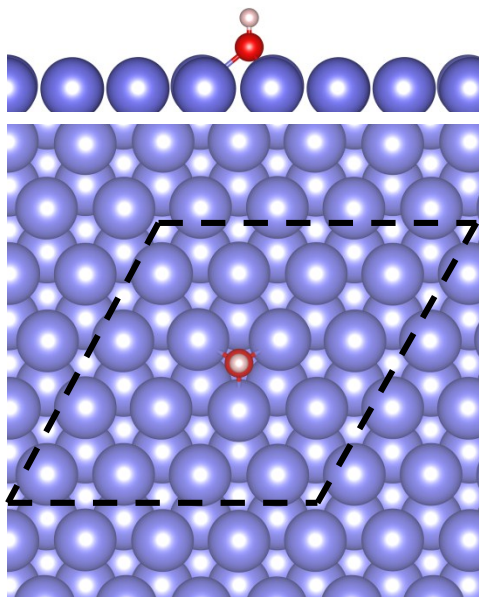

**Figure S14.** Side (upper panel) and top (lower panel) views of OH adsorption on Cu(111) surfaces, including corresponding adsorption energies. Dashed lines indicate the (4×4) supercell for (111) surfaces.

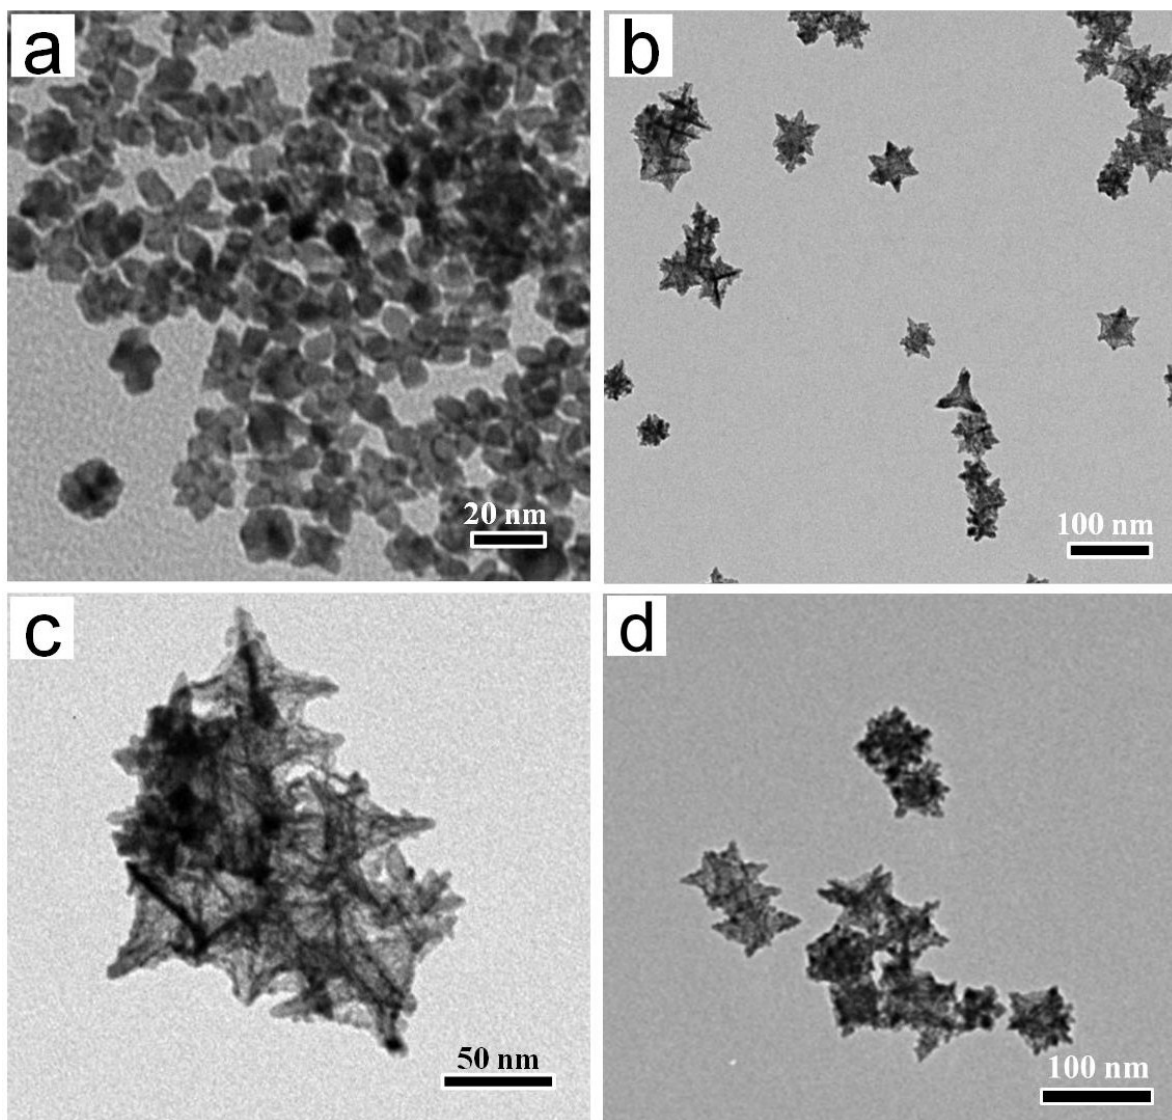

**Figure S15.** TEM images of PtCuFe, PtCuCo, PtCuMn and PtCuCr alloy NFs synthesized with the similar method.

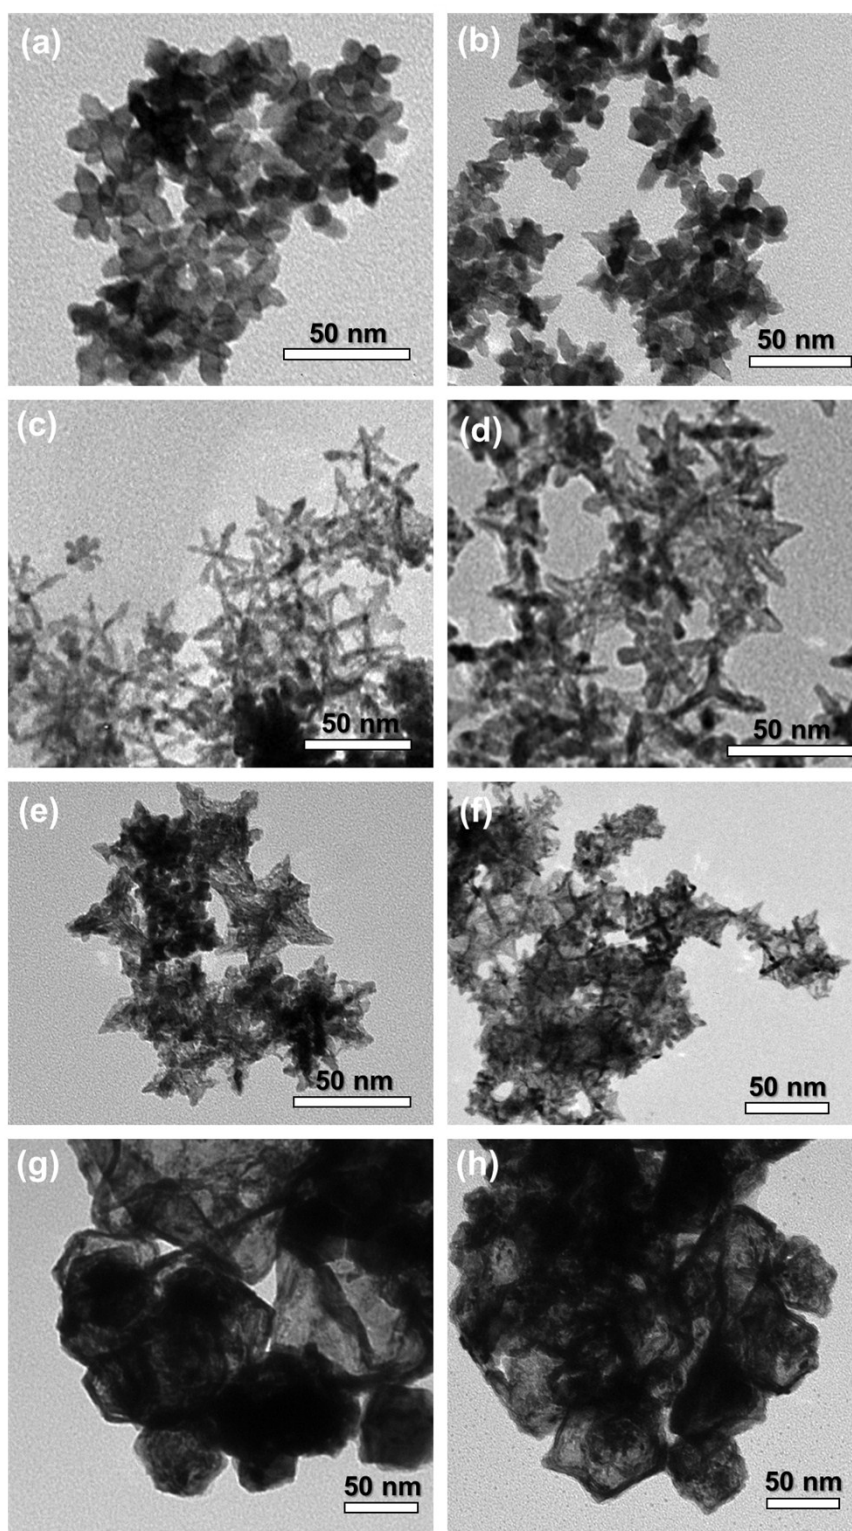

**Figure S16.** The TEM images of Pt-based alloy after 1000 potential cycles for MOR (a, c, e and g) and FAOR (b, d, f and h). Notes: PtCuNi h-NFs (a and b), PtCuNi o-NFs (c and d), PtCuNi c-NFs (e and f) and PtCuNi HWs (g and h).

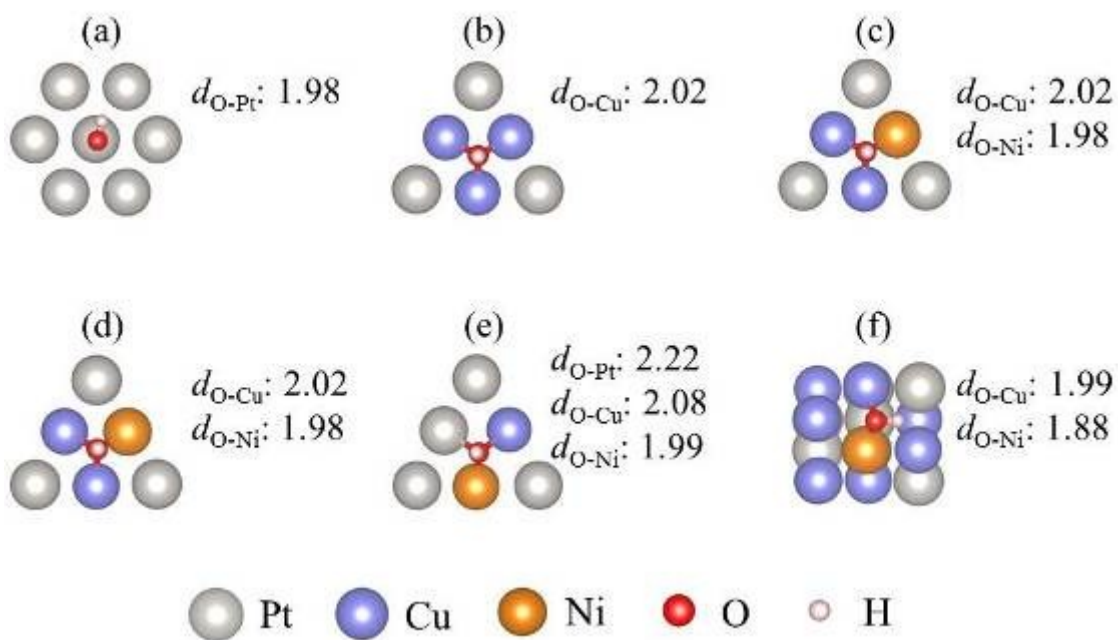

**Figure S17.** O-metal bond lengths (in Å) of OH adsorption on (a) Pt(111), (b) Pt<sub>1</sub>Cu<sub>5/3</sub>(111), (c) Pt<sub>1</sub>Cu<sub>5/3</sub>Ni<sub>x</sub> (111), (d) Pt<sub>1</sub>Cu<sub>3</sub>Ni<sub>x</sub> (111), (e) Pt<sub>1</sub>Cu<sub>1</sub>Ni<sub>x</sub> (111) and (d) Pt<sub>1</sub>Cu<sub>5/3</sub>Ni<sub>x</sub> (211) surfaces.

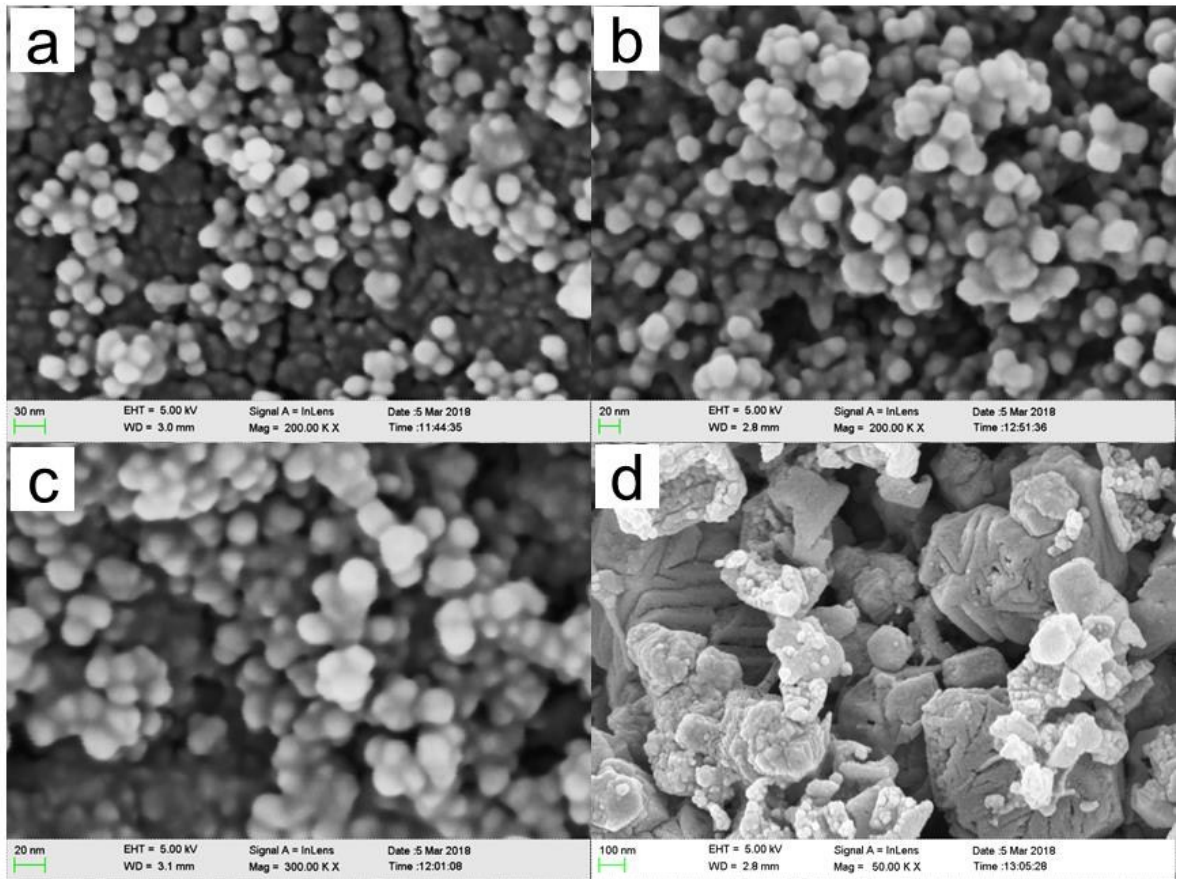

**Figure S18.** SEM images of h-NFs, o-NFs, c-NFs, and HWs PtCuNi.



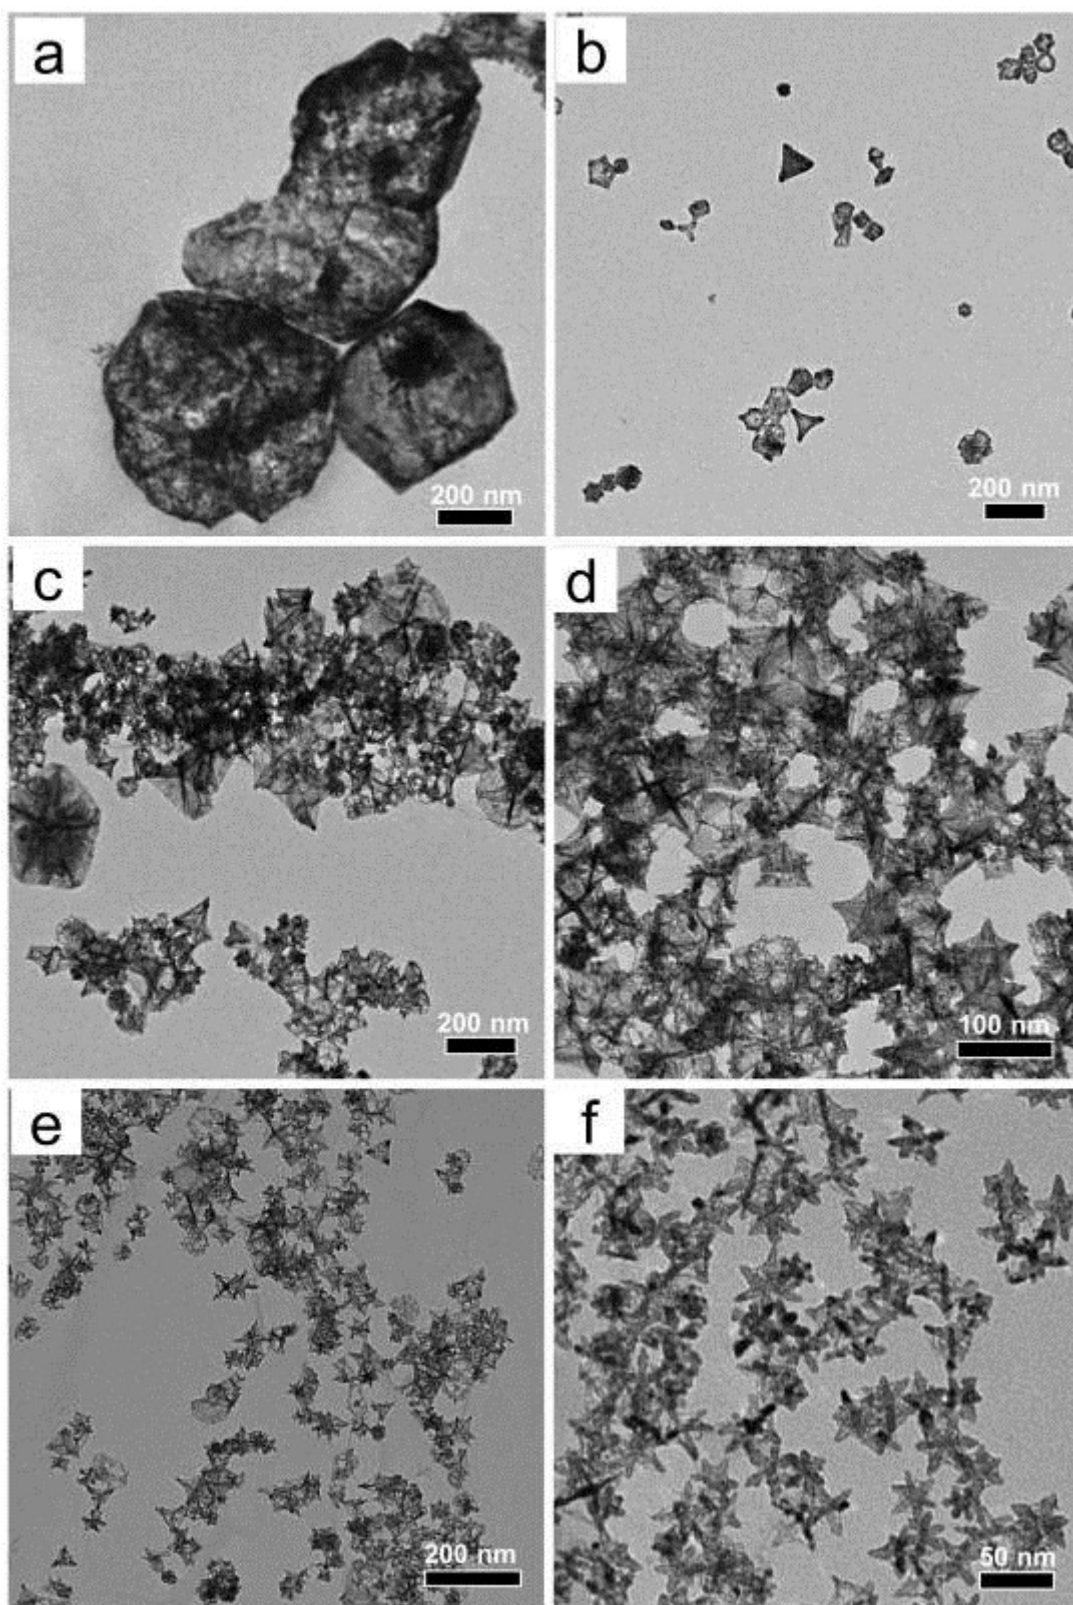

**Figure S19.** The TEM images of PtCuNi synthesized by the standard procedure, but with different NaI amount. (a) 0 mg, (b) 30 mg, (c) 80 mg, (d) 120 mg, (e) 150 mg, and (f) 400 mg.



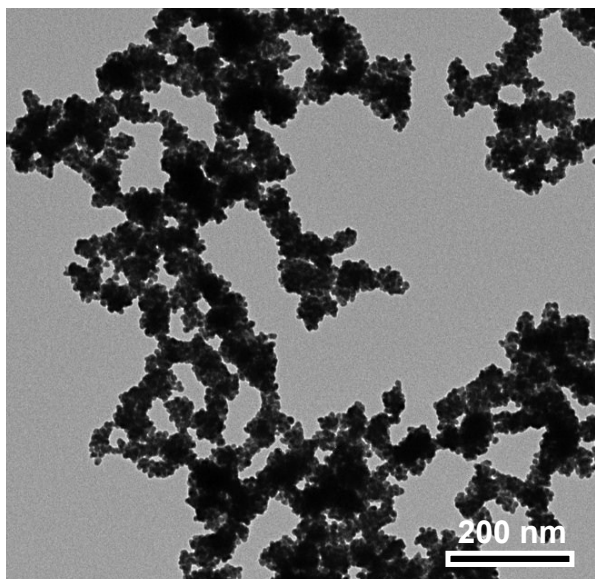

**Figure S20.** The TEM images of PtCuNi synthesized by the standard procedure, but change the glycine with 300 mg glutamic acid.

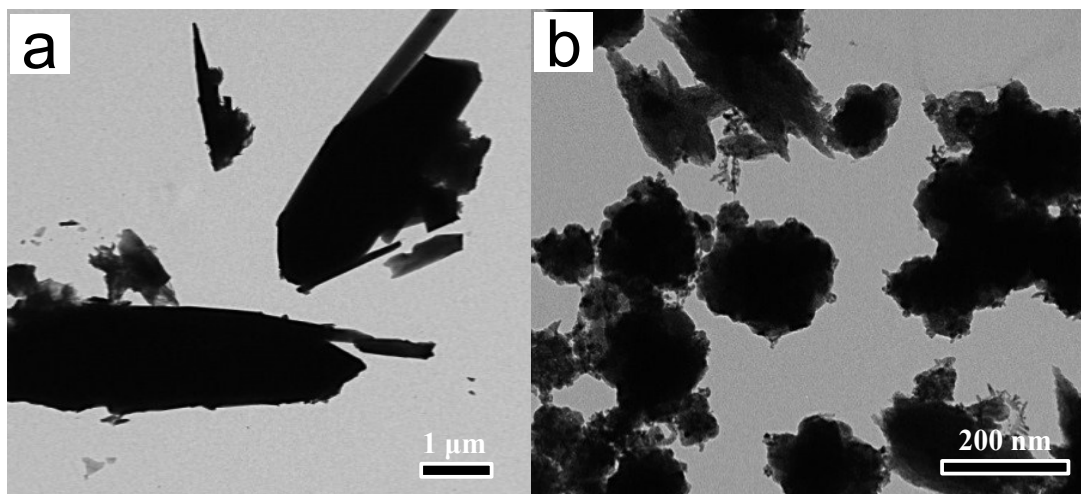

**Figure S21.** TEM images of PtCuNi synthesized by the standard procedure, but varying the amount of CuCl<sub>2</sub> and NiCl<sub>2</sub>, (a) CuCl<sub>2</sub> 2.0 mL, NiCl<sub>2</sub> 0.2 mL, (b) CuCl<sub>2</sub> 1.6 mL, NiCl<sub>2</sub> 0.4 mL.

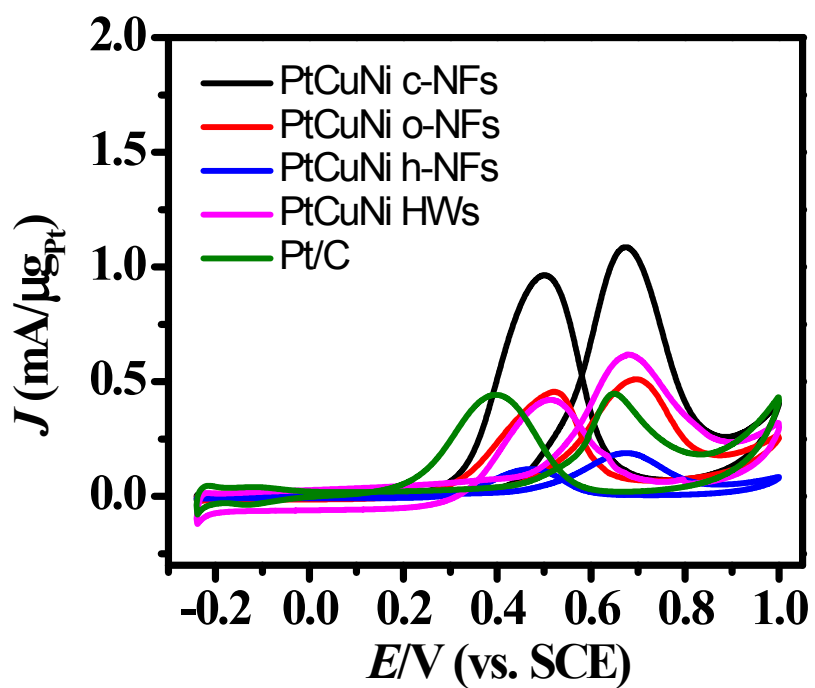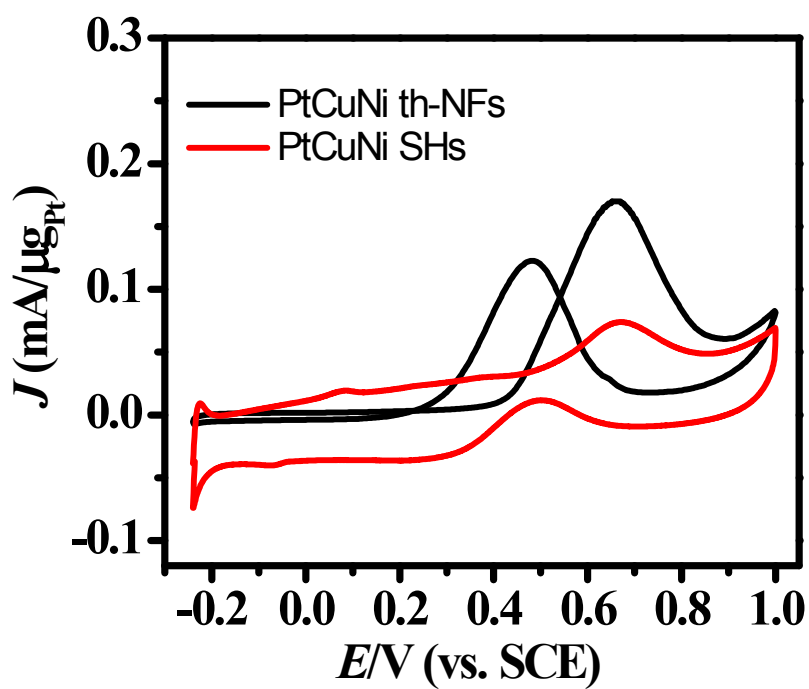

**Figure S22.** Cyclic voltammograms of methanol electro-oxidation for PtCuNi and Pt/C in a mixture of 0.5 M  $\text{H}_2\text{SO}_4$  and 2 M  $\text{CH}_3\text{OH}$  at a scan rate of 50 mV/s.

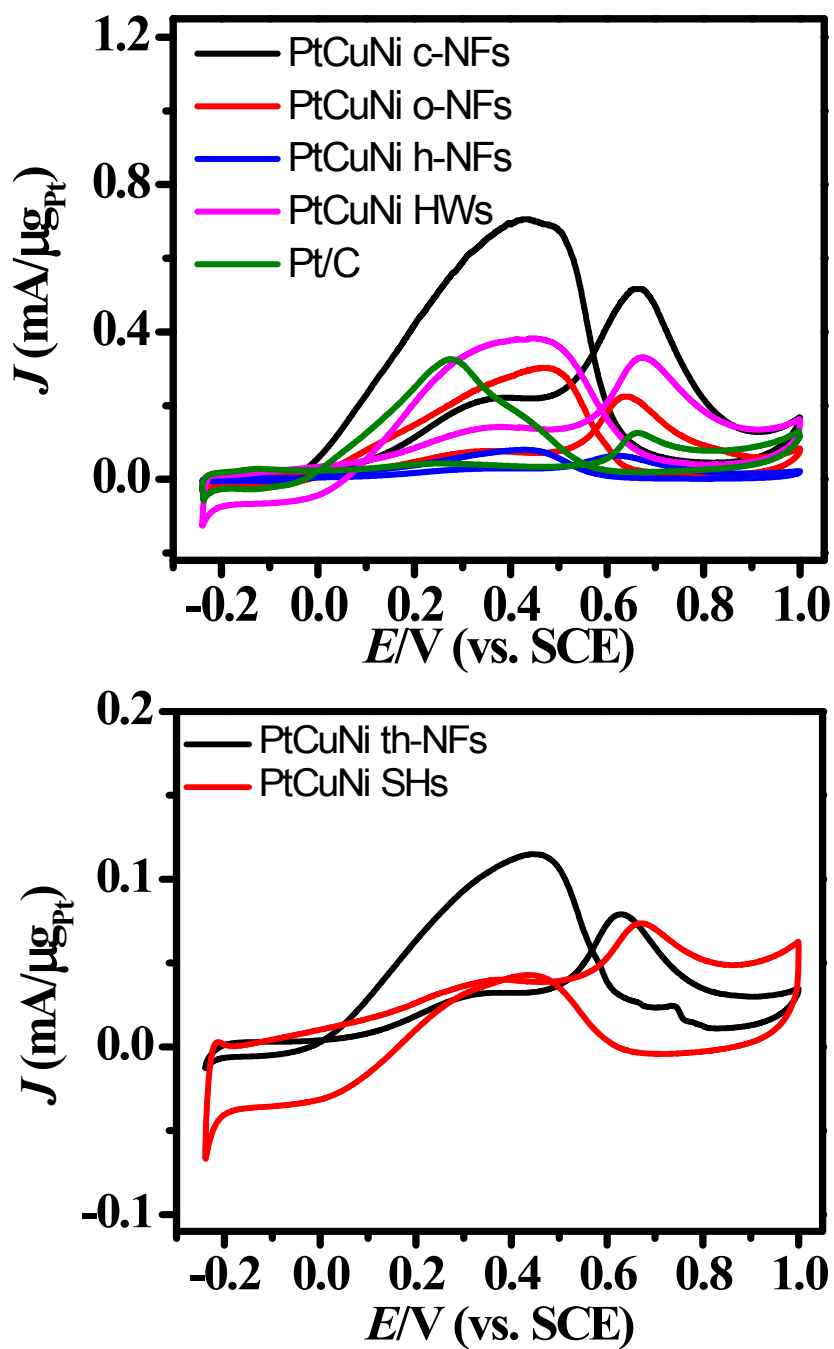

**Figure S23.** Cyclic voltammograms of formic acid electro-oxidation over PtCuNi and Pt/C in a mixture of 0.5 M  $\text{H}_2\text{SO}_4$  and 0.25 M  $\text{HCOOH}$  at a scan rate of 50 mV/s.

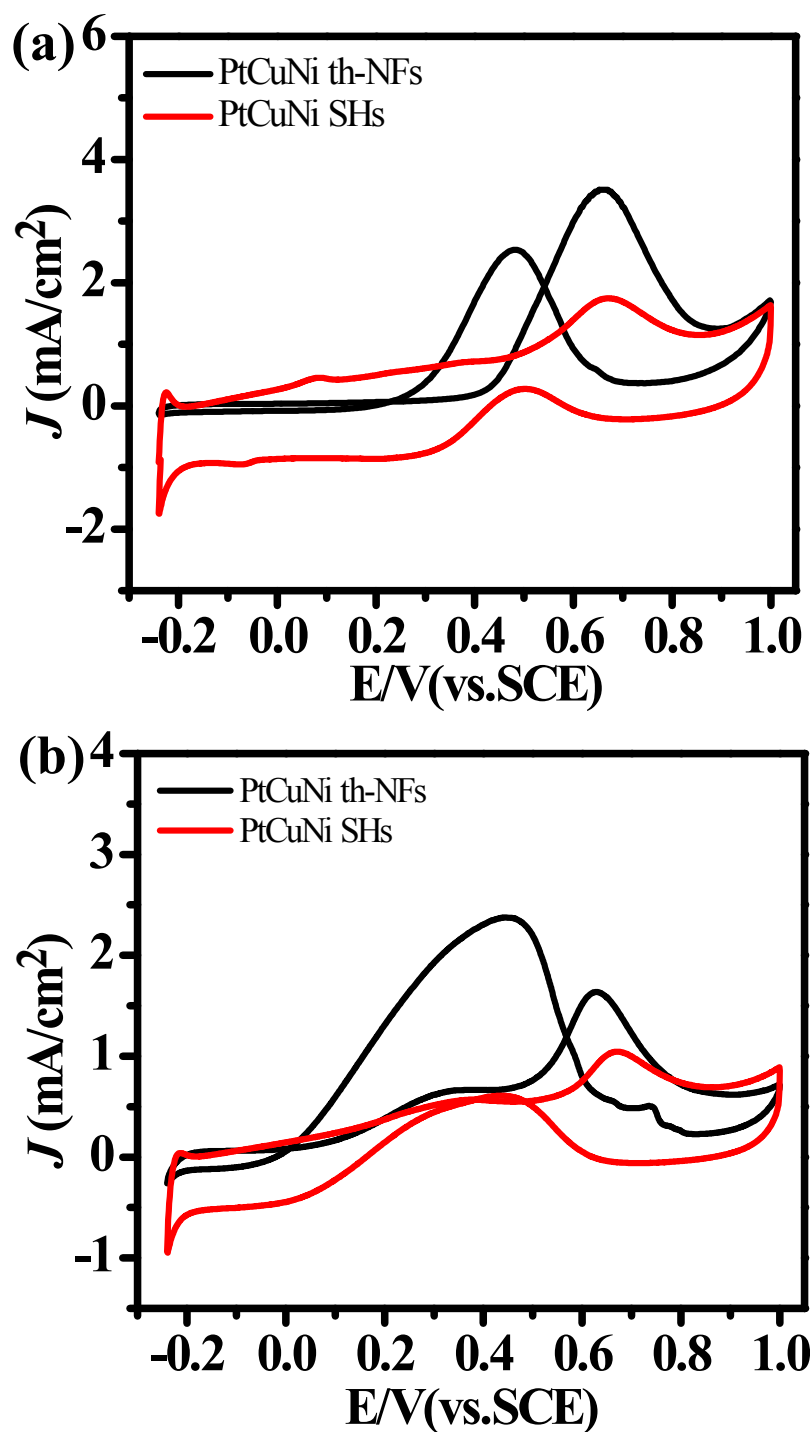

**Figure S24.** (a) Cyclic voltammograms of methanol electro-oxidation for th-NFs and SHs PtCuNi in a mixture of 0.5 M H<sub>2</sub>SO<sub>4</sub> and 2 M CH<sub>3</sub>OH at a scan rate of 50 mV/s. (b) Cyclic voltammograms of formic acid electro-oxidation in a mixture of 0.5 M H<sub>2</sub>SO<sub>4</sub> and 0.25 M HCOOH at a scan rate of 50 mV/s.

## References

- [1] Luan C, Zhou Q X, Wang Y, et al. A General Strategy Assisted with Dual Reductants and Dual Protecting Agents for Preparing Pt-Based Alloys with High-Index Facets and Excellent Electrocatalytic Performance[J]. *Small*, 2017, 13(46), 1702617.
- [2] Qi Y, Bian T, Choi S I, et al. Kinetically controlled synthesis of Pt-Cu alloy concave nanocubes with high-index facets for methanol electro-oxidation[J]. *Chemical Communications*, 2014, 50(5), 560-562.
- [3] Xu X, Zhang X, Sun H, et al. Synthesis of Pt-Ni alloy nanocrystals with high-index facets and enhanced electrocatalytic properties[J]. *Angewandte Chemie*, 2014, 126(46), 12730-12735.
- [4] Zhan F, Bian T, Zhao W, et al. Facile synthesis of Pd-Pt alloy concave nanocubes with high-index facets as electrocatalysts for methanol oxidation[J]. *CrystEngComm*, 2014, 16(12), 2411-2416.
- [5] Zhang P, Dai X, Zhang X, et al. One-pot synthesis of ternary Pt-Ni-Cu nanocrystals with high catalytic performance[J]. *Chemistry of Materials*, 2015, 27(18), 6402-6410.
- [6] Huang X, Zhao Z, Fan J, et al. Amine-assisted synthesis of concave polyhedral platinum nanocrystals having {411} high-index facets[J]. *Journal of the American chemical Society*, 2011, 133(13), 4718-4721.
- [7] Cui Z, Chen H, Zhao M, et al. Synthesis of structurally ordered Pt<sub>3</sub>Ti and Pt<sub>3</sub>V nanoparticles as methanol oxidation catalysts[J]. *Journal of the American chemical society*, 2014, 136(29), 10206-10209.
- [8] Fu G T, Xia B Y, Ma R G, et al. Trimetallic PtAgCu@ PtCu core@ shell concave nanooctahedrons with enhanced activity for formic acid oxidation reaction[J]. *Nano Energy*, 2015, 12, 824-832.
- [9] Bu L, Guo S, Zhang X, et al. Surface engineering of hierarchical platinum-cobalt nanowires for efficient electrocatalysis[J]. *Nature communications*, 2016, 7, 11850.
- [10] Wang L, Yamauchi Y. Metallic nanocages: synthesis of bimetallic Pt-Pd hollow nanoparticles with dendritic shells by selective chemical etching[J]. *Journal of the American Chemical Society*, 2013, 135(45), 16762-16765.
- [11] Y. Qin, X. Zhang, X. Dai, et al. Graphene Oxide-Assisted Synthesis of Pt-Co Alloy Nanocrystals with High-Index Facets and Enhanced Electrocatalytic Properties, *Small*, 2016, 12, 524-533.
- [12] P. Zhang, X. Dai, X. Zhang, et al. One-Pot Synthesis of Ternary Pt-Ni-Cu Nanocrystals with High Catalytic Performance, *Chem. Mater.*, 2015, 27, 6402-6410.

- [13] Du H, Luo S, Wang K, et al. High-quality and deeply excavated Pt<sub>3</sub>Co nanocubes as efficient catalysts for liquid fuel electrooxidation[J]. *Chemistry of Materials*, 2017, 29(22), 9613-9617.
- [14] Luo M, Sun Y, Zhang X, et al. Stable High-Index Faceted Pt Skin on Zigzag-Like PtFe Nanowires Enhances Oxygen Reduction Catalysis[J]. *Advanced Materials*, 2018, 30(10), 1705515.
- [15] Ding J, Bu L, Guo S, et al. Morphology and phase controlled construction of Pt–Ni nanostructures for efficient electrocatalysis[J]. *Nano Letters*, 2016, 16(4), 2762-2767.
- [16] Xue S, Deng W, Yang F, et al. Hexapod PtRuCu Nanocrystalline Alloy for Highly Efficient and Stable Methanol Oxidation[J]. *ACS Catalysis*, 2018, 8(8), 7578-7584.
- [17] Zhang N, Bu L, Guo S, et al. Screw thread-like platinum–copper nanowires bounded with high-index facets for efficient electrocatalysis[J]. *Nano Letters*, 2016, 16(8), 5037-5043.
- [18] Huang L, Zhang X, Han Y, et al. High-index facets bounded platinum–lead concave nanocubes with enhanced electrocatalytic properties[J]. *Chemistry of Materials*, 2017, 29(10), 4557-4562.
- [19] Xu X, Zhang X, Sun H, et al. Synthesis of Pt–Ni Alloy Nanocrystals with High-Index Facets and Enhanced Electrocatalytic Properties[J]. *Angewandte Chemie*, 2014, 126(46), 12730-12735.
- [20] Luo S, Shen P K. Concave platinum–copper octopod nanoframes bounded with multiple high-index facets for efficient electrooxidation catalysis[J]. *ACS nano*, 2016, 11(12), 11946-11953.
- [21] Kuang Y, Cai Z, Zhang Y, et al. Ultrathin dendritic Pt<sub>3</sub>Cu triangular pyramid caps with enhanced electrocatalytic activity[J]. *ACS applied materials & interfaces*, 2014, 6(20), 17748-17752.
- [22] Huang L, Zhang X, Wang Q, et al. Shape-control of Pt–Ru nanocrystals: tuning surface structure for enhanced electrocatalytic methanol oxidation[J]. *Journal of the American Chemical Society*, 2018, 140(3), 1142-1147.
- [23] Tang M, Luo S, Wang K, et al. Simultaneous formation of trimetallic Pt-Ni-Cu excavated rhombic dodecahedrons with enhanced catalytic performance for the methanol oxidation reaction[J]. *Nano Research*, 2018, 11(9), 4786-4795.
